# Supplementary material for: Hypoglycemia Reduction and Changes in Hemoglobin A1c in the ASPIRE In-Home Study
Source: PubMed Central journal article supplement — Diabetes Technol Ther. 2015 Aug 1;17(8):542–7. doi: 10.1089/dia.2014.0306 (PMC4528987; doi:10.1089/dia.2014.0306), 2015-08-01
Supplement: Supp_Fig1.pdf [file Supp_Fig1.pdf]

## Supplementary Data

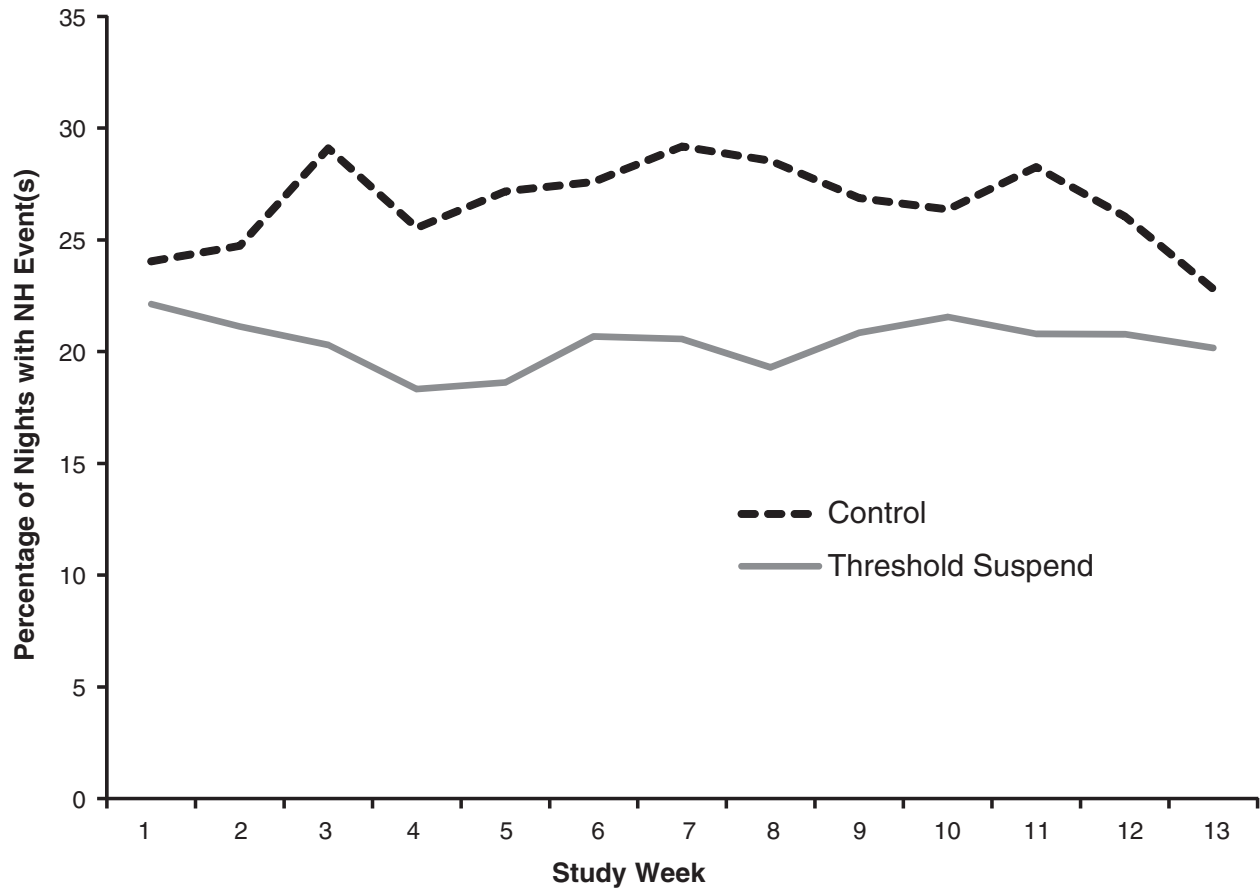

**SUPPLEMENTARY FIG. S1.** Weekly rate of hypoglycemic events versus study week in the ASPIRE In-Home Study in the Control Group (dashed black line) and the Threshold Suspend Group (solid gray line), expressed as a percentage of nights with one or more nocturnal hypoglycemia (NH) events. Compared with the Control Group, the rate in the Threshold Suspend Group was consistently lower.
