# Supplementary material for: Hypoglycemia Reduction and Changes in Hemoglobin A1c in the ASPIRE In-Home Study
Source: PubMed Central journal article supplement — Diabetes Technol Ther. 2015 Aug 1;17(8):542–7. doi: 10.1089/dia.2014.0306 (PMC4528987; doi:10.1089/dia.2014.0306), 2015-08-01
Supplement: Supp_Fig2.pdf [file Supp_Fig2.pdf]

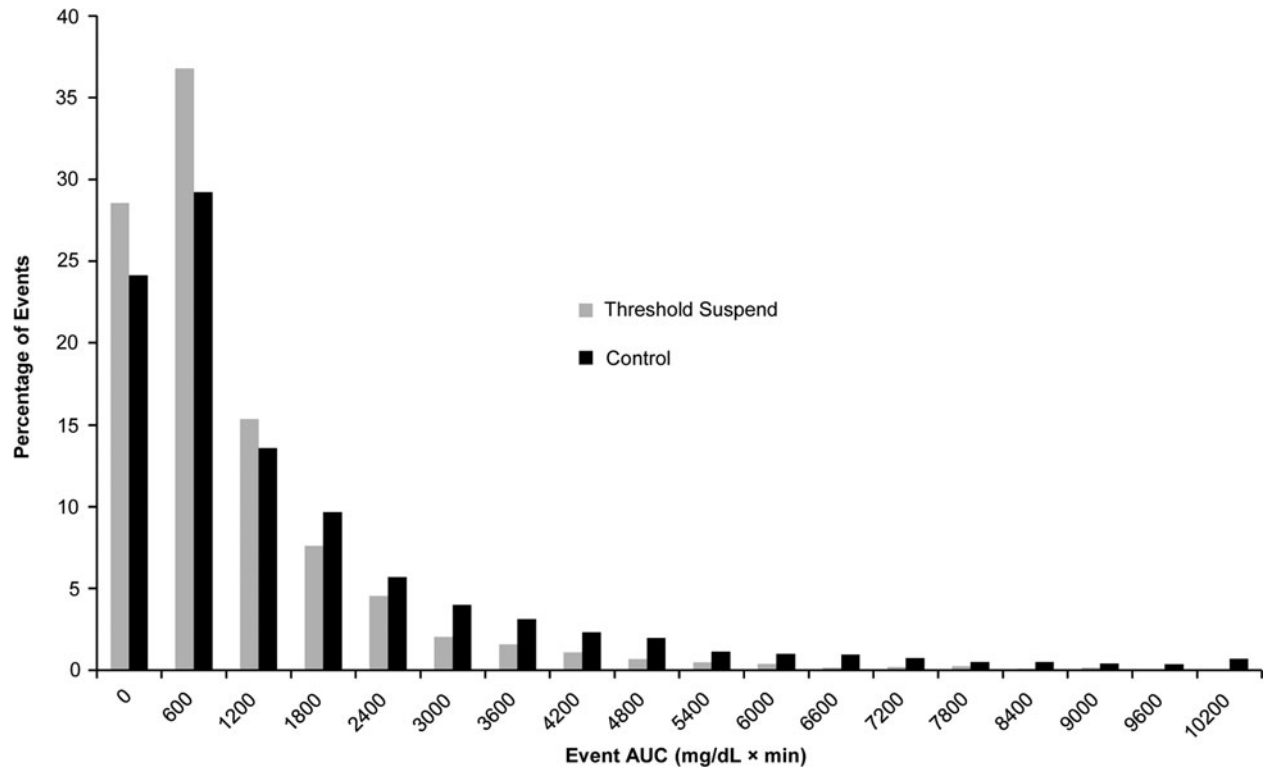

**SUPPLEMENTARY FIG. S2.** Distribution of area under the curve (AUC) values in the ASPIRE In-Home Study for  $AUC \leq 65$  mg/dL for hypoglycemic events in the Threshold Suspend Group (gray columns) and the Control Group (black columns). Compared with the Control Group, the distribution of events in the Threshold Suspend Group was shifted to the left, indicating a higher prevalence of events with low AUC values.
